# Supplementary material for: A microfluidics vapor-membrane-valve generated by laser irradiation on carbon nanocoils
Source: Royal Society of Chemistry journal article supplement (doi:10.1039/d3ra01148h), 2023-01-01
Supplement: d3ra01148h1.pdf [file d3ra01148h1.pdf]

## Supporting information

### A microfluidics vapor-membrane-valve generated by laser irradiation on carbon nanocoils

Yuli Liu,<sup>a</sup> Chengwei Li,<sup>b</sup> Ming Zhao,<sup>c</sup> Jian Shen<sup>\*d</sup> and Lujun Pan<sup>\*b</sup>

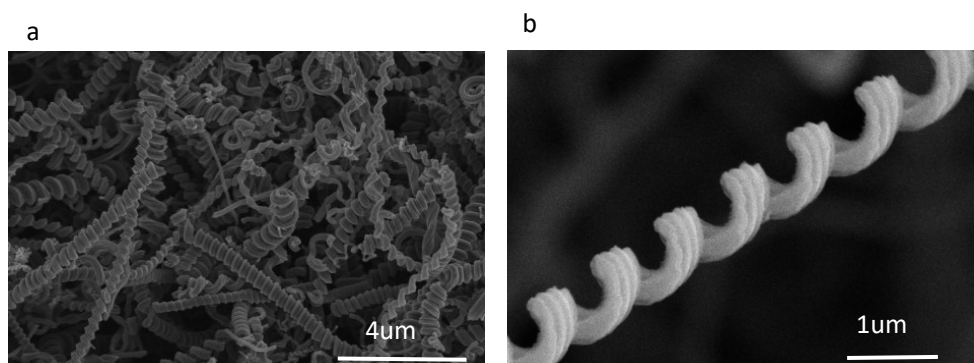

**Figure S1** (a) SEM image of a batch of CNCs. (b) SEM image of a single CNC.

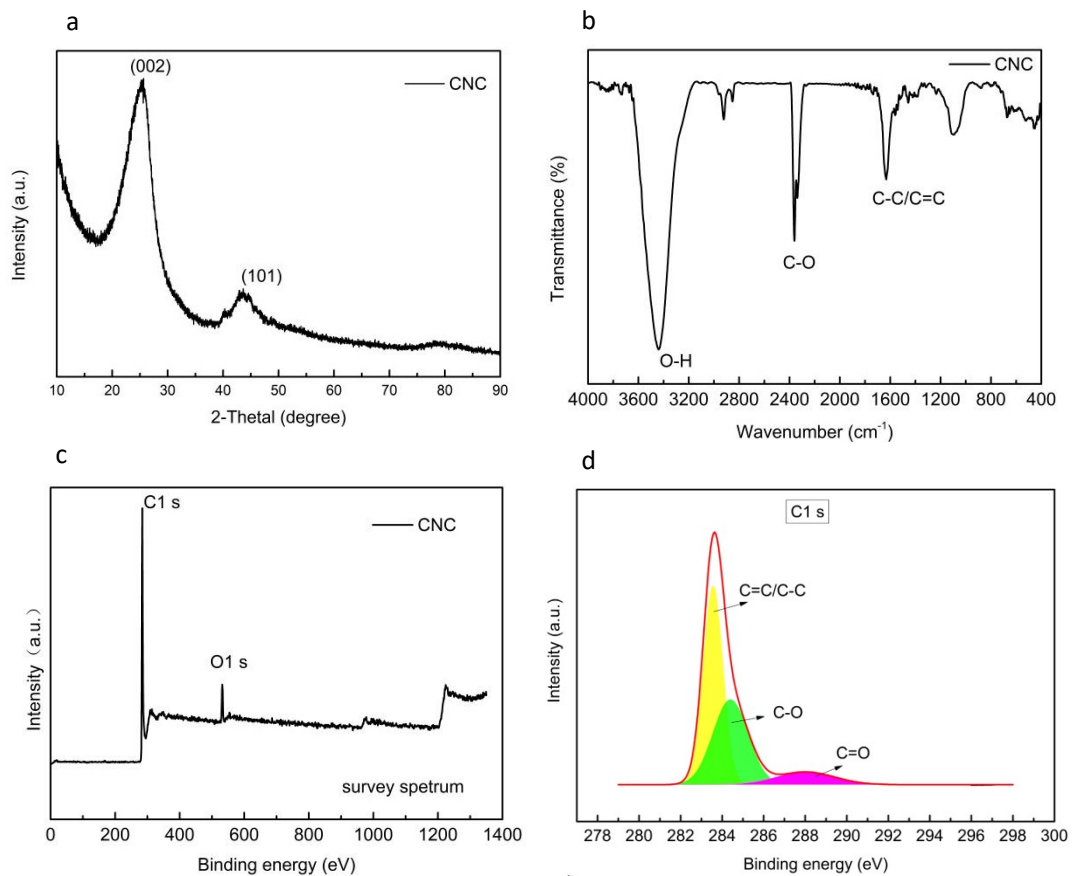

**Figure S2** (a) XRD pattern of CNCs powder sample. (b) FTIR spectra of CNCs powder sample. (c) and (d) show XPS survey spectra of CNCs and high-resolution spectra of C 1s, relatively.

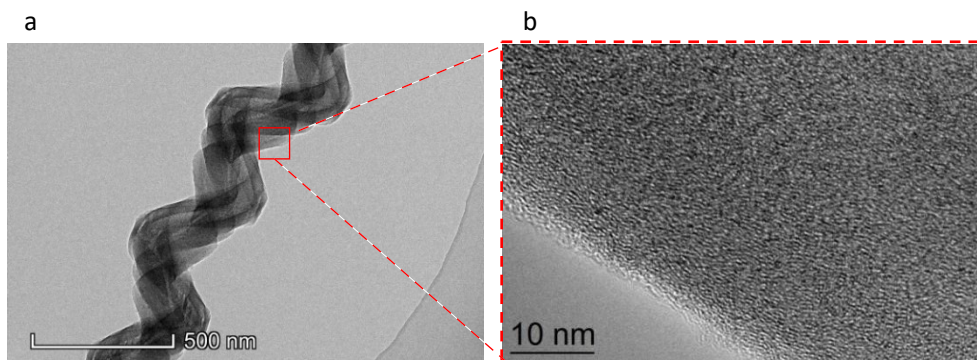

**Figure S3** (a) TEM image of a single CNC. (b) The high magnification for the dashed line area in (a).

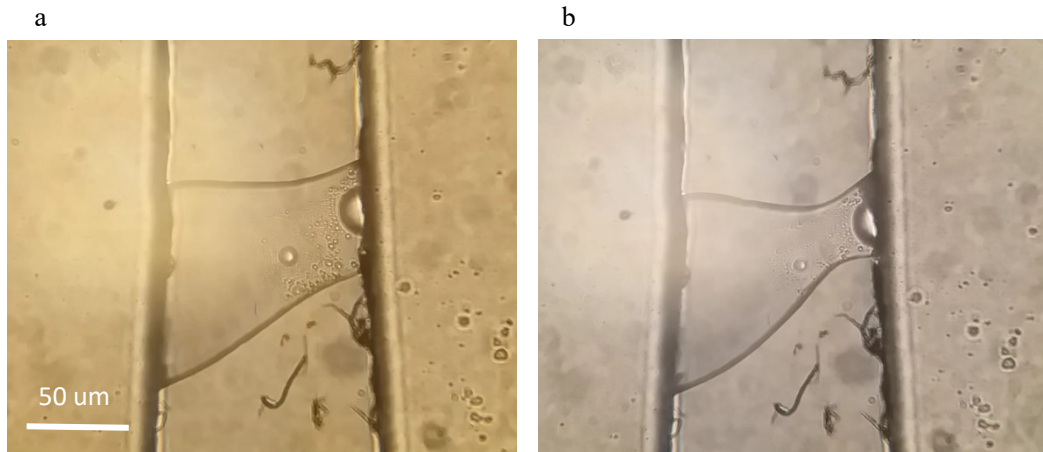

**Figure S4.** Microscope images of a MVMV depression shaped by fluid flow with 10 seconds in (a) and 15 seconds in (b).
